# Supplementary material for: Sensory processing in humans and mice fluctuates between external and internal modes
Source: PubMed Central journal article supplement (PMC10732408; doi:10.1371/journal.pbio.3002410), 2023-12-08
Supplement: pbio.3002410.s016.pdf [file pbio.3002410.s016.pdf]

## **Supplemental Table S1: Sensory processing in humans and mice fluctuates between external and internal modes**

### **Authors:**

Veith Weilhhammer<sup>1,2,3</sup>, Heiner Stuke<sup>1,2</sup>, Kai Standvoss<sup>1</sup>, Philipp Sterzer<sup>4</sup>

### **Affiliations:**

<sup>1</sup> Department of Psychiatry, Charité-Universitätsmedizin Berlin, corporate member of Freie Universität Berlin and Humboldt-Universität zu Berlin, 10117 Berlin, Germany

<sup>2</sup> Berlin Institute of Health, Charité-Universitätsmedizin Berlin and Max Delbrück Center, 10178 Berlin, Germany

<sup>3</sup> Helen Wills Neuroscience Institute, University of California Berkeley, USA

<sup>4</sup> Department of Psychiatry (UPK), University of Basel, Switzerland

### **Corresponding Author:**

Veith Weilhhammer, Helen Wills Neuroscience Institute, University of California Berkeley, USA, email: [veith.weilhhammer@gmail.com](mailto:veith.weilhhammer@gmail.com)

# Supplemental Table S1

| Authors                                                 | Journal                                | Year |
|---------------------------------------------------------|----------------------------------------|------|
| Bang, Shekhar, Rahnev                                   | JEP:General                            | 2019 |
| Bang, Shekhar, Rahnev                                   | JEP:General                            | 2019 |
| Calder-Travis, Charles, Bogacz, Yeung                   | Unpublished                            | NA   |
| Clark & Merfeld                                         | Journal of Neurophysiology             | 2018 |
| Clark                                                   | Unpublished                            | NA   |
| Faivre, Filevich, Solovey, Kuhn, Blanke                 | Journal of Neuroscience                | 2018 |
| Faivre, Vuillaume, Blanke, Cleeremans                   | bioRxiv                                | 2018 |
| Filevich & Fandakova                                    | Unpublished                            | NA   |
| Gajdos, Fleming, Saez Garcia, Weindel, Davranche        | Neuroscience of Consciousness          | 2019 |
| Gherman & Philastides                                   | eLife                                  | 2018 |
| Haddara & Rahnev                                        | PsyArXiv                               | 2020 |
| Haddara & Rahnev                                        | PsyArXiv                               | 2020 |
| Hainguerlot, Vergnaud, & de Gardelle                    | Scientific Reports                     | 2018 |
| Hainguerlot, Gajdos, Vergnaud, & de Gardelle            | Unpublished                            | NA   |
| Jachs, Blanco, Grantham-Hill, Soto                      | JEP:HPP                                | 2015 |
| Jachs, Blanco, Grantham-Hill, Soto                      | JEP:HPP                                | 2015 |
| Jachs, Blanco, Grantham-Hill, Soto                      | JEP:HPP                                | 2015 |
| Jaquiere, Yeung                                         | Unpublished                            | NA   |
| Kvam, Pleskac, Yu, Busemeyer                            | PNAS                                   | 2015 |
| Kvam, Pleskac, Yu, Busemeyer                            | PNAS                                   | 2015 |
| Kvam and Pleskac                                        | Cognition                              | 2016 |
| Law, Lee                                                | Unpublished                            | NA   |
| Lebreton, et al.                                        | Sci. Advances                          | 2018 |
| Lempert, Chen, & Fleming                                | PlosOne                                | 2015 |
| Locke*, Gaffin-Cahn*, Hosseinizaveh, Mamassian, & Landy | Attention, Perception, & Psychophysics | 2020 |
| Maniscalco, McCurdy, Odegaard, & Lau                    | J Neurosci                             | 2017 |
| Maniscalco, McCurdy, Odegaard, & Lau                    | J Neurosci                             | 2017 |
| Maniscalco, McCurdy, Odegaard, & Lau                    | J Neurosci                             | 2017 |
| Maniscalco, McCurdy, Odegaard, & Lau                    | J Neurosci                             | 2017 |
| Martin, Hsu                                             | Unpublished                            | NA   |
| Massoni & Roux                                          | Journal of Mathematical Psychology     | 2017 |
| Massoni                                                 | Unpublished                            | NA   |
| Mazor, Friston & Fleming                                | eLife                                  | 2020 |
| Mei, Rankine, Olafsson, Soto                            | bioRxiv                                | 2019 |
| Mei, Rankine, Olafsson, Soto                            | bioRxiv                                | 2019 |
| O'Hora, Zgonnikov, Kenny, Wong-Lin                      | Fechner Day proceedings                | 2017 |
| O'Hora, Zgonnikov, CiChocki                             | Unpublished                            | NA   |

(continued)

| Authors                                                  | Journal                                | Year |
|----------------------------------------------------------|----------------------------------------|------|
| O'Hora, Zgonnikov, Neverauskaite                         | Unpublished                            | NA   |
| Palser et al                                             | Consciousness & Cognition              | 2018 |
| Pereira, Faivre, Iturrate et al.                         | bioRxiv                                | 2018 |
| Prieto et al.                                            | Submitted                              | NA   |
| Rahnev et al                                             | J Neurophysiol                         | 2013 |
| Rausch & Zehetleitner                                    | Front Psychol                          | 2016 |
| Rausch et al                                             | Attention, Perception, & Psychophysics | 2018 |
| Rausch et al                                             | Attention, Perception, & Psychophysics | 2018 |
| Rausch, Zehetleitner, Steinhauser, & Maier               | NeuroImage                             | 2020 |
| Recht, de Gardelle & Mamassian                           | Unpublished                            | NA   |
| Reyes et al.                                             | PlosOne                                | 2015 |
| Reyes et al.                                             | Submitted                              | NA   |
| Rouault, Seow, Gillan, Fleming                           | Biol. Psychiatry                       | 2018 |
| Rouault, Seow, Gillan, Fleming                           | Biol. Psychiatry                       | 2018 |
| Rouault, Dayan, Fleming                                  | Nat Commun                             | 2019 |
| Sadeghi et al                                            | Scientific Reports                     | 2017 |
| Schmidt et al.                                           | Consc Cog                              | 2019 |
| Shekhar & Rahnev                                         | J Neuroscience                         | 2018 |
| Shekhar & Rahnev                                         | PsyArXiv                               | 2020 |
| Sherman et al                                            | Journal of Neuroscience                | 2016 |
| Sherman et al                                            | Journal of Cognitive Neuroscience      | 2016 |
| Sherman et al                                            | Unpublished                            | NA   |
| Sherman et al                                            | Unpublished                            | NA   |
| Siedlecka, Wereszczywski, Paulewicz, Wierzchon           | bioRxiv                                | 2019 |
| Song et al                                               | Consciousness & Cognition              | 2011 |
| van Boxtel, Orchard, Tsuchiya                            | bioRxiv                                | 2019 |
| van Boxtel, Orchard, Tsuchiya                            | bioRxiv                                | 2019 |
| Wierzchon, Paulewicz, Asanowicz, Timmermans & Cleeremans | Consciousness and Cognition            | 2014 |
| Wierzchon, Anzulewicz, Hobot, Paulewicz & Sackur         | Consciousness and Cognition            | 2019 |
