# Supplementary material for: Sensory processing in humans and mice fluctuates between external and internal modes
Source: PubMed Central journal article supplement (PMC10732408; doi:10.1371/journal.pbio.3002410), 2023-12-08
Supplement: pbio.3002410.s017.pdf [file pbio.3002410.s017.pdf]

## **Supplemental Table S2: Sensory processing in humans and mice fluctuates between external and internal modes**

### **Authors:**

Veith Weilhhammer<sup>1,2,3</sup>, Heiner Stuke<sup>1,2</sup>, Kai Standvoss<sup>1</sup>, Philipp Sterzer<sup>4</sup>

### **Affiliations:**

<sup>1</sup> Department of Psychiatry, Charité-Universitätsmedizin Berlin, corporate member of Freie Universität Berlin and Humboldt-Universität zu Berlin, 10117 Berlin, Germany

<sup>2</sup> Berlin Institute of Health, Charité-Universitätsmedizin Berlin and Max Delbrück Center, 10178 Berlin, Germany

<sup>3</sup> Helen Wills Neuroscience Institute, University of California Berkeley, USA

<sup>4</sup> Department of Psychiatry (UPK), University of Basel, Switzerland

### **Corresponding Author:**

Veith Weilhhammer, Helen Wills Neuroscience Institute, University of California Berkeley, USA, email: [veith.weilhhammer@gmail.com](mailto:veith.weilhhammer@gmail.com)

## Supplemental Table S2

---

| Parameters | Interpretation                                                                |
|------------|-------------------------------------------------------------------------------|
| $\alpha$   | Sensitivity to sensory information                                            |
| H          | Expected probability of a switch in the cause of sensory information (Hazard) |
| $a_{LLR}$  | Amplitude of fluctuations in likelihood precision $\omega_{LLR}$              |
| $a_{\psi}$ | Amplitude of fluctuations in prior precision $\omega_{\psi}$                  |
| f          | Frequency of $\omega_{LLR}$ and $\omega_{\psi}$                               |
| p          | Phase (p for $\omega_{LLR}$ ; p + $\pi$ for $\omega_{\psi}$ )                 |
| $\zeta$    | Inverse decision temperature                                                  |

---
